# Supplementary material for: SARS-CoV-2 suppresses anticoagulant and fibrinolytic gene expression in the lung
Source: eLife journal article supplement (doi:10.7554/elife.64330), 2021-03-08
Supplement: supp [file elife-64330-supp-v2.zip]

Archive with 1 entries (1 files):
- elife_poa_e64330_Transparent_Reporting_File.pdf
